# Supplementary material for: Association of Food Allergy and Other Allergic Conditions With Autism Spectrum Disorder in Children
Source: PubMed Central journal article supplement (PMC6324407; doi:10.1001/jamanetworkopen.2018.0279), 2018-06-08
Supplement: jamanetwopen-1-e180279-s001.pdf [file jamanetwopen-1-e180279-s001.pdf]

## Supplementary Online Content

Xu G, Snetselaar LG, Jing J, Liu B, Strathearn L, Bao W. Association of food allergy and other allergic conditions with autism spectrum disorder in children. *JAMA Netw Open*. 2018;1(2):e180279. doi:10.1001/jamanetworkopen.2018.0279

**eTable.** Association of Food Allergy and Other Allergic Conditions With ASD, a Sensitivity Analysis by Restricting to Children (n = 171 881) Whose Information Was Reported by Their Parents Rather Than Other Household Members

This supplementary material has been provided by the authors to give readers additional information about their work.

**eTable. Association of food allergy and other allergic conditions with ASD, a sensitivity analysis by restricting to children (n= 171881) whose information was reported by their parents rather than other household members.**

|                     | <b>Children without ASD</b> | <b>Children with ASD</b> | <b>Model 1<sup>a</sup></b> | <b>Model 2<sup>b</sup></b> | <b>Model 3<sup>c</sup></b> |
|---------------------|-----------------------------|--------------------------|----------------------------|----------------------------|----------------------------|
| Food allergy        | 4.35% <sup>*</sup>          | 11.53% <sup>*</sup>      | 2.87 (2.38-3.47)           | 2.73 (2.25-3.31)           | 2.32 (1.89-2.86)           |
| Respiratory allergy | 12.13% <sup>*</sup>         | 18.40% <sup>*</sup>      | 1.54 (1.33-1.80)           | 1.50 (1.28-1.75)           | 1.25 (1.06-1.47)           |
| Skin allergy        | 10.11% <sup>*</sup>         | 17.01% <sup>*</sup>      | 1.85 (1.58-2.17)           | 1.77 (1.52-2.07)           | 1.49 (1.26-1.76)           |

ASD, autism spectrum disorders.

<sup>\*</sup> Data are expressed as weighted prevalence of each allergic condition among children with or without ASD.

<sup>a</sup> Model 1: adjusted for age and sex.

<sup>b</sup> Model 2: model 1 plus race/ethnicity, family highest education level, family income to poverty ratio, and geographic region.

<sup>c</sup> Model 3: model 2 plus mutual adjustment for other allergic conditions as mentioned.
